# Supplementary material
Source: publisher figshare collection journal article supplement (https://gsapubs.figshare.com/ndownloader/files/22409289)
Supplement: Supplementary file 1 [file 22409289]

## Sheet: Sheet1
Bennett, S.E.K., Oskin, M.E., Dorsey, R.J., Iriondo, A., and Kunk, M.J., 2015, Stratigraphy and structural development of the southwest Isla Tiburón marine basin: Implications for latest Miocene tectonic opening and flooding of the northern Gulf of California: Geosphere, v. 11, doi:10.1130/GES01153.1.
Table 3. 40Ar/39Ar laser total fusion data of single-crystal sanidine crystals from the Tuff of Hast Pitzcal, Southwest Isla Tiburón, México.
Hole	39Ark	Radiogenic	40Ar*	K/Ca	K/Cl	Age		Error
number	(Moles)	Yield (%)	39Ark			(Ma)		(Ma)
sample TIB-09-15 Tuff of Hast Pitzcal (Ttha) sanidine J = 0.004411 ± 0.25% #189KD53
15	6.26563e-15	77.9	0.79497	19.0876	25000	6.31511	±	0.05161
23	4.22173e-15	88	0.79603	19.3611	3125	6.3235	±	0.07318
16	5.96395e-15	80.6	0.79625	26.0892	25000	6.32529	±	0.03849
1	8.74359e-15	95.9	0.79722	17.334	8333.33	6.33299	±	0.03907
21	6.07653e-15	92.5	0.79816	19.8295	14285.7	6.34041	±	0.03168
12	4.10597e-15	95.5	0.80305	22.5836	4545.45	6.37917	±	0.09306
5	4.56497e-15	93.2	0.80399	21.4961	9090.91	6.38669	±	0.07659
8	5.58699e-15	84.5	0.80415	21.3904	5882.35	6.38793	±	0.06779
13	6.18935e-15	95.8	0.80484	14.1443	14285.7	6.39344	±	0.03127
17	5.25501e-15	96.1	0.80698	13.3262	6666.67	6.4104	±	0.03643
7	5.90211e-15	61.3	0.80745	15.0083	9090.91	6.41408	±	0.07806
22	8.93002e-15	90.3	0.8075	20.734	6666.67	6.41447	±	0.0255
2	6.69981e-15	89.3	0.80798	23.6463	4545.45	6.41829	±	0.05253
10	4.8486e-15	92.6	0.81052	23.9177	7692.31	6.43844	±	0.07887
30	5.10919e-15	96.1	0.81101	17.9115	3448.28	6.44234	±	0.03751
32	4.8495e-15	97.1	0.81149	15.706	4347.83	6.44614	±	0.03938
4	8.1567e-15	86.1	0.81215	14.758	5555.56	6.45138	±	0.04684
28	4.88403e-15	89.8	0.81262	17.0474	2380.95	6.4551	±	0.03969
11	5.66644e-15	76.2	0.81279	17.6772	4545.45	6.45645	±	0.07223
14	4.99634e-15	92.4	0.81331	17.1145	20000	6.46056	±	0.0427
9	3.58627e-15	99.4	0.8135	22.3464	***	6.46211	±	0.0963
26	3.76814e-15	88	0.81381	16.6417	11111.1	6.46449	±	0.05122
29	6.23737e-15	98.7	0.81398	14.2126	8333.33	6.46589	±	0.03083
33	2.76565e-15	95.2	0.81468	15.7381	7692.31	6.47141	±	0.06233
36	3.16627e-15	66.5	0.81611	18.2415	10000	6.48277	±	0.08003
35	5.96252e-15	92.3	0.81745	16.4555	2127.66	6.49336	±	0.03604
31	3.7569e-15	97.3	0.81833	19.1791	3448.28	6.5004	±	0.0464
37	2.06598e-15	99.5	0.82109	21.5378	5882.35	6.52228	±	0.0934
19	5.55465e-15	93.9	0.82155	24.6427	3571.43	6.52594	±	0.05252
34	3.80119e-15	96	0.82195	17.0532	9090.91	6.52904	±	0.04779
25	5.13023e-15	96.6	0.82408	17.449	3333.33	6.54596	±	0.03619
20	3.73274e-15	43	0.82504	20.2265	4347.83	6.55357	±	0.09644
27	1.99493e-15	94.2	0.82778	16.3666	2777.78	6.57531	±	0.086
24	2.56683e-15	97.3	0.83935	16.8663	2222.22	6.66705	±	0.08055
		MSWD = 1.47	Weighted Mean Age =			6.44	±	0.05
